# Supplementary material for: Thermodynamics of Pb(ii) and Zn(ii) binding to MT-3, a neurologically important metallothionein
Source: Royal Society of Chemistry journal article supplement (doi:10.1039/c5mt00209e), 2015-12-24
Supplement: c5mt00209e1.pdf [file c5mt00209e1.pdf]

## Supplemental Information

### “Thermodynamics of Pb(II) and Zn(II) binding to MT-3, a neurologically important metallothionein”

M. C. Carpenter, A. Shami Shah, S. DeSilva, A. Gleaton, A. Su, B. Goundie, M. L. Croteau, M. J. Stevenson, D. E. Wilcox, and R. N. Austin

Description of the determination of the formation enthalpy ( $\Delta H$ ) and stability constant ( $K$ ) for the formation of metal-EDTA complexes at a specific pH.

To provide more detail about how data from the NIST database was used in the thermodynamic analyses, the treatment of  $Zn^{2+}$ EDTA formation at pH 6.0 in Bis-Tris buffer is outlined in detail. An analogous approach was used for  $Pb^{2+}$ EDTA formation at pH 6.0 in MES buffer.

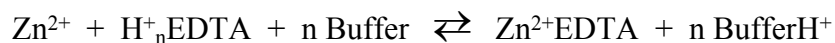

#### Enthalpy of Formation: $\Delta H$

$$\Delta H_{Zn-EDTA}(pH\ 6.0) = -n\Delta H_{EDTA-H} + \Delta H_{Zn-EDTA} + n\Delta H_{Buffer-H}$$

Here,  $n$  is the number of protons that are displaced from the EDTA by the metal ion and subsequently protonate the buffer.

To determine  $n$ , the protonation state of the EDTA at the desired pH is found with the Henderson-Hasselbalch relationship.

$$pH = pK_a + \log([A^-]/[HA])$$

Since two of the  $pK_a$  values of EDTA are well below pH 6.0, they are not included in the analysis. The percentage of protonation associated with  $pK_a$  6.13 is determined by the following analysis.

$$\begin{aligned} 6.0 &= 6.13 + \log([A^-]/[HA]) \\ -0.13 &= \log([A^-]/[HA]) \\ 10^{-0.13} &= [A^-]/[HA] \\ 0.741 &= [A^-]/[HA] = X \end{aligned}$$

#### EDTA (NIST database)

|     | pKa  | $\Delta H$ |
|-----|------|------------|
| 4H+ | 2    | 0.3        |
| 3H+ | 2.69 | 1.5        |
| 2H+ | 6.13 | -4.2       |
| 1H+ | 9.52 | -5.6       |

$$\% \text{ protonated} = [A^-] + [HA] = [HA]X + [HA] = [HA](X + 1)$$

$$\% \text{ protonated} = \frac{[HA]}{(X + 1)}$$

$$\% \text{ protonated} = \frac{100\%}{(0.741 + 1)} = 57.4 \%$$

Repeating this calculation for  $pK_a$  9.52 results in 99.7% protonation. This gives an overall EDTA protonation of  $0.574 + 0.997 = 1.57$  protons at pH 6.0.

Now, using values for  $\Delta H_{\text{Buffer-H}}$  and  $\Delta H_{\text{Zn-EDTA}}$  from NIST, the above equation is solved.

$$\Delta H_{\text{Zn-EDTA}}(\text{pH } 6.0)$$

$$= -n\Delta H_{\text{EDTA-H}} + \Delta H_{\text{Zn-EDTA}} + n\Delta H_{\text{Buffer-H}}$$

$$= -0.574(-4.2 \text{ kcal/mol}) - 0.997(-5.6 \text{ kcal/mol}) + (-4.7 \text{ kcal/mol}) + 1.57(-6.86 \text{ kcal/mol})$$

$$= -7.5 \text{ kcal/mol}$$

### Stability Constant: K

The NIST value for the  $\text{Zn}^{2+}\text{EDTA}$  stability constant is independent of pH, so this value needs to be adjusted to the experimental pH to account for proton competition with  $\text{Zn}^{2+}$  for EDTA.

$$\begin{aligned} K_{\text{Zn-EDTA}}(\text{pH } 6.0) &= \frac{K_{\text{Zn-EDTA}}}{[1 + K_{\text{EDTA-H1}}[\text{H}^+] + K_{\text{EDTA-H1}}K_{\text{EDTA-H2}}[\text{H}^+]^2]} \\ &= \frac{3.16 \times 10^{16}}{[1 + (10^{9.52})(10^{-6.0}) + (10^{9.52})(10^{6.13})(10^{-6.0})^2]} \\ &= \frac{3.16 \times 10^{16}}{[1 + (3.3 \times 10^9)(1 \times 10^{-6}) + (3.3 \times 10^9)(1.3 \times 10^6)(1 \times 10^{-12})]} \\ &= \frac{3.16 \times 10^{16}}{1 + 3300 + 4290} \\ &= 4.1 \times 10^{12} \end{aligned}$$
